# Supplementary material for: Inclusion of Vitamin A Intake Data Provides Improved Compartmental Model-Derived Estimates of Vitamin A Total Body Stores and Disposal Rate in Older Adults
Source: PubMed Central journal article supplement (PMC6602889; doi:10.1093/jn/nxz056), 2019-05-16
Supplement: nxz056_supplemental_file.pdf [file nxz056_supplemental_file.pdf]

**Supplemental Table 1** Kinetic parameters for geometric mean models and individual subjects<sup>1</sup>

| Parameter by group       | Population (GM) models |        |         | Individual fit to 2 EV DI model |          |          |          |         |          |         |         |
|--------------------------|------------------------|--------|---------|---------------------------------|----------|----------|----------|---------|----------|---------|---------|
|                          | 1 EV                   | 2 EV   | 2 EV DI | US1                             | US2      | US3      | US4      | US5     | US6      | US7     | GM      |
| US                       |                        |        |         |                                 |          |          |          |         |          |         |         |
| L(2,1), d <sup>-1</sup>  | 50                     | 50     | 50      | 50                              | 50       | 50       | 50       | 50      | 50       | 50      | 50      |
| L(5,2), d <sup>-1</sup>  | 0.355                  | 0.460  | 0.386   | 0.526                           | 1.64     | 0.370    | 1.02     | 1.10    | 0.229    | 0.370   | 0.608   |
| DT(3), d                 | 0.237                  | 0.243  | 0.239   | 0.230                           | 0.251    | 0.229    | 0.263    | 0.236   | 0.251    | 0.235   | 0.242   |
| L(5,4), d <sup>-1</sup>  | 0.658                  | 0.806  | 0.714   | 0.754                           | 0.600    | 0.693    | 0.816    | 1.88    | 0.639    | 0.857   | 0.827   |
| MST <sub>RBP</sub> , d   | 1.80                   | 1.52   | 1.68    | 1.60                            | 1.96     | 1.71     | 1.53     | 0.806   | 1.86     | 1.44    | 1.51    |
| L(0,2), d <sup>-1</sup>  | 16.8                   | 16.8   | 16.8    | 16.8                            | 17.2     | 16.8     | 17.0     | 17.0    | 16.7     | 16.8    | 16.9    |
| L(6,5), d <sup>-1</sup>  | 7.85                   | 7.25   | 5.29    | 3.48                            | 6.18     | 4.00     | 18.0     | 4.28    | 2.24     | 6.02    | 5.10    |
| L(5,6), d <sup>-1</sup>  | 0.0346                 | 0.0275 | 0.0126  | 0.0102                          | 0.0640   | 0.00810  | 0.0212   | 0.0320  | 0.00355  | 0.0181  | 0.0156  |
| L(10,6), d <sup>-1</sup> | 0.0155                 | 0.0117 | 0.00109 | 0.000906                        | 0.000438 | 0.000878 | 0.000769 | 0.00514 | 0.000762 | 0.00141 | 0.00106 |
| L(7,5), d <sup>-1</sup>  |                        | 2.28   | 3.09    | 2.05                            | 14.7     | 3.71     | 6.75     | 6.69    | 2.58     | 2.28    | 4.36    |
| L(5,7), d <sup>-1</sup>  |                        | 0.383  | 0.119   | 0.191                           | 0.0121   | 0.100    | 0.292    | 1.16    | 0.0814   | 0.156   | 0.139   |
| Chinese                  |                        |        |         |                                 |          |          |          |         |          |         |         |
| L(2,1), d <sup>-1</sup>  | 50                     | 50     | 50      | 50                              | 50       | 50       | 50       | 50      | 50       | 50      | 50      |
| L(5,2), d <sup>-1</sup>  | 0.315                  | 0.360  | 0.346   |                                 | 0.300    | 0.0109   |          | 0.186   | 1.32     |         | 0.168   |
| DT(3), d                 | 0.136                  | 0.151  | 0.150   | 0.0689                          | 0.155    | 0.249    | 0.0787   | 0.146   | 0.161    |         | 0.130   |
| L(5,4), d <sup>-1</sup>  | 0.638                  | 0.906  | 0.861   | 1.50                            | 0.589    | 1.17     | 0.923    | 0.868   | 1.54     |         | 1.04    |
| MST <sub>RBP</sub> , d   | 1.74                   | 1.30   | 1.35    | 0.776                           | 1.89     | 1.14     | 1.20     | 1.34    | 0.849    |         | 1.15    |
| L(0,2), d <sup>-1</sup>  | 16.8                   | 16.8   | 16.8    | 16.6                            | 16.7     | 16.6     | 16.6     | 16.7    | 17.1     |         | 16.8    |
| L(6,5), d <sup>-1</sup>  | 4.09                   | 3.30   | 2.86    | 2.96                            | 3.92     | 3.31     | 3.75     | 2.83    | 1.38     |         | 2.87    |
| L(5,6), d <sup>-1</sup>  | 0.0407                 | 0.0234 | 0.0135  | 0.0165                          | 0.00834  | 0.0152   | 0.0136   | 0.0154  | 0.0156   |         | 0.0138  |
| L(10,6), d <sup>-1</sup> | 0.0234                 | 0.0148 | 0.00392 | 0.00492                         | 0.00141  | 0.00325  | 0.00468  | 0.00557 | 0.00732  |         | 0.00403 |
| L(7,5), d <sup>-1</sup>  |                        | 2.32   | 2.39    | 3.87                            | 2.10     | 3.034    | 3.29     | 2.042   | 4.92     |         | 3.06    |
| L(5,7), d <sup>-1</sup>  |                        | 0.407  | 0.272   | 0.699                           | 0.0921   | 0.426    | 0.262    | 0.477   | 0.588    |         | 0.356   |

<sup>1</sup> Values are kinetic parameters calculated using a model (Figure 1) with either 1 extravascular pool (1 EV) or 2 extravascular pools (without or with dietary intake as an input; 2 EV and 2 EV DI, respectively) for geometric mean datasets for a group of US (US1 – 7) and Chinese (CH1 – 6) subjects. In all cases, we fixed L(2,1) (Figure 1), representing movement down the GI tract, at 50/d based on previous work in this lab on these same subjects (**Supplemental Reference 1**). Also shown are kinetic parameters calculated for individuals using the 2 EV DI model. Kinetic parameters are L(I,J)s, or the fraction of retinol in compartment J transferred to compartment I each day; DT(3), or the time (d) spent in delay component 3 (Figure 1); and MST<sub>RBP</sub>, mean sojourn time to retinol-binding protein, calculated as the sum of the turnover times for compartments 1, 2 and 4 plus the time (d) in delay component 3, or  $[1 / L(2,1) + 1 / L(3,2) + 1 / L(5,4) + DT(3)] \times 24$ , where  $L(3,2) = L(2,1)$ . See **Supplemental Table 3** for additional calculated parameters that correspond to the results presented here. GM, geometric mean.

**Supplemental Table 2** Steady state model predictions, days of vitamin A stores and estimated liver vitamin A concentrations for individual subjects<sup>1</sup>

| ID        | U(1)<br>1 EV | U(1)<br>2 EV DI | DR<br>1 EV  | DR<br>2 EV DI | M(5)        | M(6)<br>1EV | M(6)<br>2 EV DI | M(7)<br>2 EV DI | TBS<br>2 EV DI | Days of<br>stores<br>1 EV | Days of<br>stores<br>2 EV DI | Liver VA<br>1 EV | Liver VA<br>2 EV DI |
|-----------|--------------|-----------------|-------------|---------------|-------------|-------------|-----------------|-----------------|----------------|---------------------------|------------------------------|------------------|---------------------|
| US1       | 19.2         | 2.79            | 14.4        | 2.10          | 7.41        | 675         | 2312            | 79.3            | 2391           | 46.9                      | 1141                         | 0.441            | 1.56                |
| US2       | 27.9         | 2.81            | 20.9        | 2.10          | 4.11        | 2669        | 4810            | 397             | 5206           | 127.7                     | 2473                         | 2.01             | 3.92                |
| US3       | 18.3         | 2.82            | 13.7        | 2.12          | 5.41        | 649         | 2409            | 201             | 2610           | 47.3                      | 1233                         | 0.391            | 1.57                |
| US4       | 20.1         | 2.82            | 15.1        | 2.11          | 3.34        | 1668        | 2745            | 77.3            | 2823           | 110                       | 1337                         | 1.26             | 2.13                |
| US5       | 6.34         | 3.21            | 4.76        | 3.21          | 5.42        | 293         | 625             | 31.3            | 656            | 61.6                      | 204                          | 0.217            | 0.487               |
| US6       | 12.8         | 2.80            | 9.64        | 2.10          | 5.30        | 385         | 2753            | 168             | 2922           | 40.0                      | 1393                         | 0.265            | 2.01                |
| US7       | 13.2         | 2.82            | 9.94        | 2.11          | 4.86        | 781         | 1503            | 71.2            | 1574           | 78.7                      | 745                          | 0.463            | 0.933               |
| <b>GM</b> | <b>15.5</b>  | <b>2.86</b>     | <b>11.6</b> | <b>2.24</b>   | <b>4.99</b> | <b>778</b>  | <b>2116</b>     | <b>109</b>      | <b>2233</b>    | <b>67.0</b>               | <b>998</b>                   | <b>0.529</b>     | <b>1.52</b>         |
| CH1       | 7.64         | 3.30            | 5.73        | 2.10          | 3.65        | 168         | 502             | 20.2            | 523            | 29.2                      | 211                          | 0.120            | 0.376               |
| CH2       | 11.4         | 2.81            | 8.54        | 2.10          | 3.73        | 477         | 1500            | 85.2            | 1586           | 55.8                      | 752                          | 0.319            | 1.06                |
| CH3       | 6.04         | 2.85            | 4.53        | 2.12          | 3.67        | 444         | 658             | 26.1            | 684            | 98.1                      | 320                          | 0.277            | 0.426               |
| CH4       | 6.16         | 2.95            | 4.62        | 2.11          | 2.31        | 181         | 472             | 29.0            | 501            | 39.2                      | 227                          | 0.135            | 0.373               |
| CH5       | 4.80         | 2.87            | 3.60        | 3.21          | 2.86        | 223         | 386             | 12.2            | 398            | 62.0                      | 185                          | 0.140            | 0.250               |
| CH6       | 5.32         | 2.91            | 3.99        | 2.10          | 4.96        | 102         | 298             | 41.4            | 340            | 25.5                      | 156                          | 0.067            | 0.225               |
| <b>GM</b> | <b>6.60</b>  | <b>2.94</b>     | <b>4.95</b> | <b>2.26</b>   | <b>3.43</b> | <b>230</b>  | <b>547</b>      | <b>29.5</b>     | <b>581</b>     | <b>46.3</b>               | <b>263</b>                   | <b>0.154</b>     | <b>0.391</b>        |

<sup>1</sup>Results are model-predicted values obtained using a model (Figure 1) with 1 extravascular pool (1 EV) or 2 extravascular pools (without or with dietary intake as an input; 2 EV and 2 EV DI, respectively) for US (US1 – 7) and Chinese (CH1 – 6) subjects. Shown are values calculated using the plasma retinol pool size [M(5),  $\mu\text{mol}$ ] in a steady state solution; values include dietary vitamin A intake [U(1),  $\mu\text{mol/d}$ ], mass of vitamin A in compartments 6 and 7 and in TBS ( $\mu\text{mol}$ ), and vitamin A disposal rate [DR,  $\mu\text{mol/d}$ , calculated as  $M(6) \times L(10,6)$  (see Supplemental Table 1)]; TBS for the 1 EV model equals M(6) and for the 2 EV and 2 EV DI models, TBS equals M(6) + M(7). Also shown are days of vitamin A stores (d), calculated as TBS / DR, and liver vitamin A concentrations ( $\mu\text{mol/g}$ ), calculated as model-predicted TBS / liver weight (g, see Table 1). DR, disposal rate; GM, geometric mean; M(I), mass of vitamin A in compartment I; TBS, total body stores.

**Supplemental Table 3** Additional calculated kinetic parameters for individual subjects<sup>1</sup>

| Parameter by group        | Population (GM) models |       |         | Individual fit to 2 EV DI model |        |       |        |        |       |       |       |
|---------------------------|------------------------|-------|---------|---------------------------------|--------|-------|--------|--------|-------|-------|-------|
|                           | 1 EV                   | 2 EV  | 2 EV DI | US1                             | US2    | US3   | US4    | US5    | US6   | US7   | GM    |
| US                        |                        |       |         |                                 |        |       |        |        |       |       |       |
| $\bar{t}(5)$ , d          | 0.127                  | 0.105 | 0.119   | 0.181                           | 0.0479 | 0.130 | 0.0404 | 0.0912 | 0.207 | 0.120 | 0.100 |
| $\bar{t}(6)$ , d          | 28.9                   | 36.4  | 79.1    | 97.6                            | 15.6   | 124   | 47.2   | 31.2   | 282   | 55.3  | 63.9  |
| $\bar{t}(7)$ , d          |                        | 2.61  | 8.39    | 5.22                            | 82.3   | 10.0  | 3.42   | 0.864  | 12.3  | 6.41  | 7.20  |
| $\bar{T}(5,5)$ , d        | 0.411                  | 0.463 | 2.39    | 3.54                            | 1.95   | 2.55  | 1.58   | 1.69   | 2.52  | 2.30  | 2.23  |
| $\bar{T}(6,5)$ , d        | 64.4                   | 85.7  | 919     | 1104                            | 2285   | 1138  | 1300   | 195    | 1313  | 711   | 946   |
| $\bar{T}(7,5)$ , d        |                        | 2.75  | 61.9    | 37.8                            | 188    | 94.9  | 36.6   | 9.75   | 80.2  | 33.7  | 48.7  |
| $\bar{T}(\text{SYS})$ , d | 64.8                   | 89.0  | 984     | 1145                            | 2475   | 1236  | 1338   | 206    | 1395  | 747   | 1001  |
| $\nu(5)$                  | 2.23                   | 3.41  | 19.0    | 18.5                            | 39.8   | 18.7  | 38.2   | 17.5   | 11.2  | 18.1  | 21.1  |
| $\bar{t}\bar{t}(5)$ , d   | 28.9                   | 25.95 | 51.6    | 61.5                            | 62.1   | 66.0  | 35.0   | 11.7   | 124   | 41.1  | 47.2  |
| Chinese                   |                        |       |         |                                 |        |       |        |        |       |       |       |
|                           | 1 EV                   | 2 EV  | 2 EV DI | CH1                             | CH2    | CH3   | CH4    | CH5    | CH6   |       | GM    |
| $\bar{t}(5)$ , d          | 0.244                  | 0.178 | 0.190   | 0.146                           | 0.166  | 0.158 | 0.142  | 0.205  | 0.159 |       | 0.161 |
| $\bar{t}(6)$ , d          | 24.6                   | 42.8  | 74.0    | 60.4                            | 120    | 65.6  | 73.4   | 64.8   | 64.0  |       | 72.4  |
| $\bar{t}(7)$ , d          |                        | 2.46  | 3.67    | 1.43                            | 10.8   | 2.34  | 3.82   | 2.09   | 1.70  |       | 2.81  |
| $\bar{T}(5,5)$ , d        | 0.670                  | 0.781 | 1.55    | 1.48                            | 1.77   | 1.72  | 1.04   | 1.33   | 2.27  |       | 1.56  |
| $\bar{T}(6,5)$ , d        | 42.8                   | 67.7  | 255     | 203                             | 711    | 308   | 214    | 180    | 137   |       | 248   |
| $\bar{T}(7,5)$ , d        |                        | 4.455 | 13.6    | 8.16                            | 40.4   | 12.2  | 13.1   | 5.69   | 19.0  |       | 13.4  |
| $\bar{T}(\text{SYS})$ , d | 43.5                   | 72.9  | 271     | 213                             | 753    | 322   | 228    | 186    | 157.9 |       | 265   |
| $\nu(5)$                  | 1.74                   | 3.39  | 7.17    | 9.07                            | 9.65   | 9.90  | 6.35   | 5.49   | 13.30 |       | 8.59  |
| $\bar{t}\bar{t}(5)$ , d   | 24.6                   | 21.2  | 37.5    | 23.3                            | 77.9   | 32.3  | 35.7   | 33.8   | 11.7  |       | 30.6  |

<sup>1</sup>Values are kinetic parameters calculated using results from a model (Figure 1) with either 1 extravascular pool (1 EV) or 2 extravascular pools (without or with dietary intake as an input; 2 EV and 2 EV DI, respectively) for geometric mean datasets for a group of US (US1 – 7) and Chinese (CH1 – 6) subjects. Calculated parameters include: transit times [ $\bar{t}(J)$ , or the mean of the distribution of times a retinol molecule spends in compartment J during a single transit, calculated as  $1/\sum L(I,J)$ s exiting compartment J] for retinol in plasma [ $\bar{t}(5)$ ] and extravascular compartments 6 [ $\bar{t}(6)$ ] and 7 [ $\bar{t}(7)$ ]; mean residence times [ $\bar{T}(I,J)$ , or the mean of the distribution of times the tracer spends in compartment I after entering the system via compartment J, where J is compartment 5 for tracer that was absorbed] for retinol in plasma [ $\bar{T}(5,5)$ ], the extravascular compartments 6 and 7 [ $\bar{T}(6,5)$  and  $\bar{T}(7,5)$ , respectively], and the system [ $\bar{T}(\text{SYS})$ , equal to  $\bar{T}(5,5) + \bar{T}(6,5) + \bar{T}(7,5)$ ]; recycling number for plasma  $\{\nu(5)$ , or the mean number of times a molecule of retinol recycles to plasma before being irreversibly lost, calculated as  $[\bar{T}(5,5) / \bar{t}(5)] - 1$ }; and recycling time to plasma  $\{\bar{t}\bar{t}(5)$ , calculated as  $[\bar{T}(6,5) + \bar{T}(7,5)] / \nu(5)$ . For more information on calculation of parameters, see (3). GM, geometric mean.

## Supplemental WinSAAM Deck

```

A SAAM31                US & CH POPULATION DATASETS [12-DEC-2018]
CC 7-COMPARTMENT MODEL FOR VITAMIN A
CC INCLUDING 2 EXTRAVASCULAR (EV) COMPARTMENTS AND DIETARY INTAKE (2 EV DI)
CC US POPULATION (GEOMETRIC MEAN) DATASET (N=7)
CC PARAMETERS
H PAR
CC          VALUE          LOWER LIMIT    UPPER LIMIT
CC IC(I)=INITIAL CONDITION (FRACTION OF DOSE) IN COMPARTMENT I AT TIME 0
    IC(1)=1.0
CC L(I,J)=FRACTION OF J TRANSFERRED TO I PER DAY (DAY^-1)
    L(2,1)    50
    L(3,2)=L(2,1)
    L(5,2)    3.859802E-01  0.000000E+00  5.000000E+00
CC L(0,2)=FRACTIONAL LOSS OF UNABSORBED TRACER
CC ASSUMING 75% ABSORPTION EFFICIENCY; L(0,2)=1/3 OF [L(2,1)+L(5,2)]
    L(0,2)=0.333*(L(3,2)+ L(5,2))
CC DN(I)=NUMBER OF ELEMENTS IN DELAY COMPONENT I
CC DT(I)=DELAY TIME IN COMPONENT I (DAY)
    DN(3)    8
    DT(3)    2.394382E-01  0.000000E+00  1.000000E+00
CC OUTPUT FROM DELAY COMPONENT EQUALS 1
    L(4,3)=1.0
    L(5,4)    7.138983E-01  0.000000E+00  1.000000E+01
    L(6,5)    5.287296E+00  0.000000E+00  2.500000E+01
    L(5,6)    1.263508E-02  0.000000E+00  2.000000E+01
CC L(10,6)=FRACTIONAL CATABOLIC RATE OF COMPARTMENT 6;
CC COMPARTMENT 10 IS LOSS FROM THE SYSTEM
    L(10,6)   1.087773E-03  0.000000E+00  1.000000E+00
    L(7,5)    3.094179E+00  0.000000E+00  2.500000E+01
    L(5,7)    1.192151E-01  0.000000E+00  1.000000E+01
CC STEADY STATE SOLUTION
CC U(I)=VITAMIN A INTAKE RATE (UMOL/D)
CC M(I)=MASS OF VITAMIN A IN COMPARTMENT I (UMOL)
H STE
    U(1)    2.793367    0.0    100
CC M(5)=PLASMA RETINOL POOL (UMOL)
    M(5)    5
CC MODEL-PREDICTED MASSES IN COMPARTMENTS 6 & 7
CC M(6)=1926 UMOL
CC M(7)=130 UMOL
CC DATA
H DAT
CC WEIGHTED U(1) AT AVERAGE RDA OF 2.8 UMOL/D
CC          TIME (D)          U(1)          FRACTIONAL STANDARD DEVIATION
100          U(1)          0.0          2.8          FSD=0.10
CC PLASMA RETINOL FROM ORAL [D8]RETINYL ACETATE
105          FSD=0.05
CC GEOMETRIC MEAN OF OBSERVED (QO) DATA FOR 7 US SUBJECTS AT ALL TIMES
CC EXCEPT 2 EV MODEL-CALCULATED (QC) DATA USED FOR US3 AT 7 TIMES FROM
CC 10 TO 52D WHEN TIMES DIFFERED; 4 OUTLIERS (US1 AT 38D, US2 AT 31D,
CC US4 AT 17D, US7 AT 17D); 2 MISSING (US1 AT 45D, US3 AT 13HR)

```

```

CC          TIME (D)          PLASMA FRACTION OF ORAL DOSE
          0                    0
          0.125                0
          0.2083               0.001390934
          0.2917               0.010563772
          0.375                 0.03713231
          0.4583               0.04772708
          0.5417               0.046686674
          1                    0.044926003
          2                    0.022206398
          3                    0.012916192
          4                    0.008823351
          5                    0.006459032
          6                    0.005154786
          10                   0.003098615
          17                   0.002476407
          24                   0.002240187
          31                   0.00199649
          38                   0.001850071
          45                   0.001741402
          52                   0.001611746
CC CHINESE POPULATION (GEOMETRIC MEAN) DATASET (N=6)
CC PARAMETERS
H PAR
CC          VALUE          LOWER LIMIT    UPPER LIMIT
CC IC(I)=INITIAL CONDITION (FRACTION OF DOSE) IN COMPARTMENT I AT TIME 0
      IC(11)=1.0
CC L(I,J)=FRACTION OF J TRANSFERRED TO I PER DAY (DAY^-1)
      L(12,11) 50
      L(13,12)=L(12,11)
      L(15,12) 3.495518E-01  0.000000E+00  5.000000E+00
CC L(0,12)=FRACTIONAL LOSS OF UNABSORBED TRACER
CC ASSUMING 75% ABSORPTION EFFICIENCY; L(0,12)=1/3 OF [L(12,11)+L(15,12)]
      L(0,12)=0.333*(L(13,12)+ L(15,12))
CC DN(I)=NUMBER OF ELEMENTS IN DELAY COMPONENT I
CC DT(I)=DELAY TIME IN COMPONENT I (DAY)
      DN(13) 8
      DT(13) 1.500189E-01  0.000000E+00  1.000000E+00
      L(14,13)=1.0
      L(15,14) 8.614130E-01  0.000000E+00  1.000000E+01
      L(16,15) 2.865249E+00  0.000000E+00  2.500000E+01
      L(15,16) 1.352236E-02  0.000000E+00  2.000000E+01
CC L(20,16)=FRACTIONAL CATABOLIC RATE OF COMPARTMENT 16;
CC COMPARTMENT 20 IS LOSS FROM THE SYSTEM
      L(20,16) 3.915200E-03  0.000000E+00  1.000000E+00
      L(17,15) 2.388299E+00  0.000000E+00  2.500000E+01
      L(15,17) 2.721264E-01  0.000000E+00  1.000000E+01
CC STEADY STATE SOLUTION
CC U(I)=VITAMIN A INTAKE RATE (UMOL/D)
CC M(I)=MASS OF VITAMIN A IN COMPARTMENT I (UMOL)
H STE
      U(11) 2.943978 0.0 100
CC M(5)=PLASMA RETINOL POOL (UMOL)
      M(15) 3.433

```

CC MODEL-PREDICTED MASSES IN COMPARTMENTS 16 & 17

CC M(16)=564 UMOL

CC M(17)=30.1 UMOL

CC DATA

H DAT

CC WEIGHTED U(11) AT AVERAGE RDA OF 2.8 UMOL/D

CC TIME (D) U(11) FRACTIONAL STANDARD DEVIATION

100 U(11) 0.0 2.8 FSD=0.10

CC PLASMA RETINOL FROM ORAL [D8]RETINYL ACETATE

115 FSD=0.05

CC GEOMETRIC MEAN OF OBSERVED (QO) DATA FOR 6 CHINESE SUBJECTS AT ALL

CC TIMES EXCEPT 2 EV MODEL-CALCULATED (QC) DATA USED FOR 1 OUTLIER

CC (CH1 AT 52D)

CC TIME (D) PLASMA FRACTION OF ORAL DOSE

|        |             |
|--------|-------------|
| 0      | 0           |
| 0.125  | 0.003235811 |
| 0.2083 | 0.018085579 |
| 0.2917 | 0.043738916 |
| 0.375  | 0.076390024 |
| 0.4583 | 0.097550717 |
| 0.5417 | 0.09094774  |
| 1      | 0.07137227  |
| 2      | 0.040691118 |
| 3      | 0.026686389 |
| 4      | 0.018733021 |
| 5      | 0.015039936 |
| 6      | 0.012597933 |
| 10     | 0.007081779 |
| 17     | 0.004640625 |
| 24     | 0.004063006 |
| 31     | 0.003654937 |
| 38     | 0.003173681 |
| 45     | 0.002839414 |
| 52     | 0.002647928 |

**Supplemental Reference**

1. Park H, Green MH. Parameter identifiability and Extended Multiple Studies Analysis of a compartmental model for human vitamin A kinetics: fixing fractional transfer coefficients for the initial steps in the absorptive process. *Br J Nutr* 2014;111:1004-10.
